# Supplementary material for: The Possible Role of Mycotoxins in the Pathogenesis of Endometrial Cancer
Source: MDPI journal article supplement (doi:10.3390/toxins16060236), 2024-05-23
Supplement: s1 [file s1]

## Supplementary Material

### The possible role of mycotoxins in the pathogenesis of endometrial cancer

Márkó Unicsovics, Zsófia Molnár, Miklós Mézes, Katalin Posta, György Nagyéri, Szabolcs Várbíró, Nándor Ács, Levente Sára and Zsuzsanna Szőke

**Table S1.** Mycotoxin level in serum and endometrial tissue (mean±SD). C: control; ECLH: Low-grade and High-grade endometrial cancer.

| Toxin            | Sample type              | Group | sample size | Min.  | Max.  | Mean±SEM                  |
|------------------|--------------------------|-------|-------------|-------|-------|---------------------------|
| Total aflatoxin  | Serum conc. (pg/ml)      | ECLH  | 20          | 0     | 208   | 47.67±11.75*              |
|                  |                          | C     | 21          | 0     | 24    | 2.875±1.31                |
|                  | Endometrium conc. (pg/g) | ECLH  | 18          | 0     | 735   | 287.0±48.32* <sup>#</sup> |
|                  |                          | C     | 18          | 0     | 672   | 113.0±35.4**              |
| Deoxynivalenol   | Serum conc. (ng/ml)      | ECLH  | 21          | 0     | 47.03 | 10.65±2.39*               |
|                  |                          | C     | 24          | 0     | 17.88 | 3.417±0.99                |
|                  | Endometrium conc. (ng/g) | ECLH  | 18          | 0.5   | 139.1 | 43.58±9.30 <sup>+</sup>   |
|                  |                          | C     | 21          | 0.5   | 93.18 | 35.25±5.42**              |
| Zearalenone      | Serum conc. (pg/ml)      | ECLH  | 20          | 0     | 3404  | 243.2±167.7               |
|                  |                          | C     | 21          | 0     | 241.2 | 33.46±11.22               |
|                  | Endometrium conc. (pg/g) | ECLH  | 18          | 0     | 686.5 | 164± 40.75 <sup>#</sup>   |
|                  |                          | C     | 18          | 0     | 134.9 | 45.01± 10.67              |
| Alpha-Zearalenol | Serum conc. (pg/ml)      | ECLH  | 20          | 23    | 1712  | 688±83.94                 |
|                  |                          | C     | 21          | 106   | 1904  | 668.4±90.33               |
|                  | Endometrium conc. (pg/g) | ECLH  | 18          | 321   | 2841  | 1383± 146.3 <sup>+</sup>  |
|                  |                          | C     | 21          | 215   | 3624  | 1286± 169.9**             |
| Ochratoxin-A     | Serum conc. (pg/ml)      | ECLH  | 20          | 0     | 84    | 22.1±4.132*               |
|                  |                          | C     | 21          | 0     | 24    | 8.25± 2.09                |
|                  | Endometrium conc. (pg/g) | ECLH  | 18          | 16    | 168   | 77.09± 9.84 <sup>+</sup>  |
|                  |                          | C     | 19          | 8     | 240   | 79.45± 12.27**            |
| Fumonisin-B1     | Serum conc. (pg/ml)      | ECLH  | 18          | 0     | 2640  | 638.1± 148.7*             |
|                  |                          | C     | 21          | 0     | 1610  | 322.5±79.9                |
|                  | Endometrium conc. (pg/g) | ECLH  | 18          | 0     | 212   | 37.77±12.65               |
|                  |                          | C     | 21          | 0     | 218   | 17.1± 10.37**             |
| T2/HT2 toxin     | Serum conc. (ng/ml)      | ECLH  | 20          | 0     | 1.6   | 0.619±0.102               |
|                  |                          | C     | 21          | 0     | 1.572 | 0.622±0.095               |
|                  | Endometrium conc. (ng/g) | ECLH  | 18          | 0.15  | 7.92  | 3.425±0.419* <sup>#</sup> |
|                  |                          | C     | 17          | 1.504 | 9.32  | 5.099± 0.455**            |

Table S1 (for Figure 1. ) Mycotoxin concentrations in serum and endometrial tissues, measured in ECL and C groups. We converted concentration mean values in the case of endometrium using 1,025g/ml se-rum density value as a multiplier: pg/ml to pg/g, ng/ml to ng/g.\* ECLH serum level significantly differs from control serum level; + ECLH endometrium level significantly differs from ECLH serum level; # ECLH endometrium level significantly differs from control endometrium level; \*\* Control endometrium level significantly differs from control serum level.

**Table S2.** Mycotoxin level in serum and endometrial tissue (mean±SD). ECL: Low-grade endometrial cancer and C: control.

| Toxin            | Sample type              | Group | sample size | Min.  | Max.  | Mean±SEM.                   |
|------------------|--------------------------|-------|-------------|-------|-------|-----------------------------|
| Total aflatoxin  | Serum conc. (pg/ml)      | ECL   | 14          | 0     | 208   | 48.79±15.38*                |
|                  |                          | C     | 21          | 0     | 24    | 3.29 ±1.48                  |
|                  | Endometrium conc. (pg/g) | ECL   | 12          | 0     | 528   | 257.0±51.09 <sup>+,#</sup>  |
|                  |                          | C     | 18          | 0     | 672   | 117.3±40.56**               |
| Deoxynivalenol   | Serum conc. (ng/ml)      | ECL   | 14          | 0     | 27.53 | 8.123±2.293*                |
|                  |                          | C     | 24          | 0     | 17.88 | 3.417±0.987                 |
|                  | Endometrium conc. (ng/g) | ECL   | 12          | 0.5   | 139.1 | 39.04±11.91 <sup>+</sup>    |
|                  |                          | C     | 21          | 0.5   | 93.18 | 33.6±5.42**                 |
| Zearalenone      | Serum conc. (pg/ml)      | ECL   | 14          | 0     | 289.4 | 63.16±19.25                 |
|                  |                          | C     | 21          | 0     | 241.2 | 33.46±11.22                 |
|                  | Endometrium conc. (pg/g) | ECL   | 12          | 0     | 686.5 | 198.9± 56.61 <sup>+,#</sup> |
|                  |                          | C     | 19          | 0     | 103.1 | 39.71± 8.24                 |
| Alpha-Zearalenol | Serum conc. (pg/ml)      | ECL   | 14          | 286   | 1712  | 606.1±107.5                 |
|                  |                          | C     | 21          | 106   | 1904  | 668.4±90.33                 |
|                  | Endometrium conc. (pg/g) | ECL   | 12          | 652   | 2320  | 1366± 158.4 <sup>+</sup>    |
|                  |                          | C     | 19          | 215   | 3624  | 1280± 194.6**               |
| Ochratoxin-A     | Serum conc. (pg/ml)      | ECL   | 14          | 0     | 68    | 23.32±5.894*                |
|                  |                          | C     | 21          | 0     | 24    | 6.762±1.546                 |
|                  | Endometrium conc. (pg/g) | ECL   | 12          | 16    | 168   | 85.67±13.72 <sup>+</sup>    |
|                  |                          | C     | 19          | 8     | 240   | 69.47± 12.67**              |
| Fumonisin-B1     | Serum conc. (pg/ml)      | ECL   | 12          | 0     | 1950  | 707.5±184.5*                |
|                  |                          | C     | 21          | 0     | 1610  | 325.2±89.83                 |
|                  | Endometrium conc. (pg/g) | ECL   | 12          | 0     | 212   | 37.5±18.66 <sup>+</sup>     |
|                  |                          | C     | 18          | 0     | 218   | 19.94±12.01**               |
| T2/HT2 toxin     | Serum conc. (ng/ml)      | ECL   | 14          | 0     | 1.6   | 0.612±0.164                 |
|                  |                          | C     | 21          | 0     | 1.572 | 0.665±0.098                 |
|                  | Endometrium conc. (ng/g) | ECL   | 12          | 0.15  | 7.92  | 2.714±0.595 <sup>+,#</sup>  |
|                  |                          | C     | 17          | 1.504 | 9.32  | 5.141± 0.51**               |

Table S2 (for Figure 2. ) Mycotoxin concentrations in serum and endometrial tissues, measured in ECL and C groups. We converted concentration mean values in the case of endometrium using 1,025g/ml se-rum density value as a multiplier: pg/ml to pg/g, ng/ml to ng/g.\* ECL serum level significantly differs from control serum level; + ECL endometrium level significantly differs from ECL serum level; # ECL endometrium level significantly differs from control endometrium level; \*\* Control endometrium level significantly differs from control serum level.
